# Supplementary material for: What is the diagnostic accuracy of single nerve conduction studies and muscle ultrasound to identify critical illness polyneuromyopathy: a prospective cohort study
Source: Crit Care. 2018 Dec 17;22:342. doi: 10.1186/s13054-018-2281-9 (PMC6296115; doi:10.1186/s13054-018-2281-9)
Supplement: Supplementary file 1 — Figure S1. STARD flow diagram for 95 patients undergoing sural NCS index test. (DOC 43 kb) [file 13054_2018_2281_MOESM1_ESM.doc]

Met inclusion criteria (n=255)

Excluded (n=155)

  Declined to participate or could not obtain informed consent (n=98)

  Pre-existing neuromyopathy (n=29)

  Pharmacologic paralysis (n=4)

  Other reasons (n=24)

Enrolled (n=100)

Excluded (n=5)

  Found to have pre-existing neuromyopathy (n=5)

No index test (n=0)

Included (n=95)

Sural NCS index test (n=95)

Index text positive

(n=62)

Index text negative

(n=33)

Index text inconclusive

(n=0)

No reference

standard (n=0)

Reference standard of probable CIPNM (n=33)

Final diagnosis

-CIPNM present (n=0)

-CIPNM absent (n=33)

-Inconclusive (n=0)

No reference

standard (n=0)

Reference standard of probable CIPNM (n=62)

Final diagnosis

-CIPNM present (n=17)

-CIPNM absent (n=45)

-Inconclusive (n=0)

No reference

standard (n=0)

Reference standard of probable CIPNM (n=0)

Final diagnosis

-CIPNM present (n=0)

-CIPNM absent (n=0)

-Inconclusive (n=0)
